# Supplementary material for: Combination therapy protects macaques against advanced Marburg virus disease
Source: PubMed Central journal article supplement (PMC7994808; doi:10.1038/s41467-021-22132-0), 2021-03-25
Supplement: 41467_2021_22132_MOESM2_ESM.pdf [file 41467_2021_22132_MOESM2_ESM.pdf]

## Reporting Summary

Nature Research wishes to improve the reproducibility of the work that we publish. This form provides structure for consistency and transparency in reporting. For further information on Nature Research policies, see our [Editorial Policies](#) and the [Editorial Policy Checklist](#).

### Statistics

For all statistical analyses, confirm that the following items are present in the figure legend, table legend, main text, or Methods section.

n/a Confirmed

- The exact sample size ( $n$ ) for each experimental group/condition, given as a discrete number and unit of measurement
- A statement on whether measurements were taken from distinct samples or whether the same sample was measured repeatedly
- The statistical test(s) used AND whether they are one- or two-sided  
*Only common tests should be described solely by name; describe more complex techniques in the Methods section.*
- A description of all covariates tested
- A description of any assumptions or corrections, such as tests of normality and adjustment for multiple comparisons
- A full description of the statistical parameters including central tendency (e.g. means) or other basic estimates (e.g. regression coefficient) AND variation (e.g. standard deviation) or associated estimates of uncertainty (e.g. confidence intervals)
- For null hypothesis testing, the test statistic (e.g.  $F$ ,  $t$ ,  $r$ ) with confidence intervals, effect sizes, degrees of freedom and  $P$  value noted  
*Give  $P$  values as exact values whenever suitable.*
- For Bayesian analysis, information on the choice of priors and Markov chain Monte Carlo settings
- For hierarchical and complex designs, identification of the appropriate level for tests and full reporting of outcomes
- Estimates of effect sizes (e.g. Cohen's  $d$ , Pearson's  $r$ ), indicating how they were calculated

*Our web collection on [statistics for biologists](#) contains articles on many of the points above.*

### Software and code

Policy information about [availability of computer code](#)

Data collection RT-qPCR data collection was performed using CFX Maestro 1.1 version 4.1.2433.1219.

Data analysis All statistical analysis was performed in Graphpad Prism v8.4.3, with the exception of the Hochberg adjustment for multiple comparisons, performed in R v.4.0.2 using the "p.adjust" function of the included stats v.4.0.2 package. RT-qPCR analysis was performed using CFX Maestro 1.1 version 4.1.2433.1219.

For manuscripts utilizing custom algorithms or software that are central to the research but not yet described in published literature, software must be made available to editors and reviewers. We strongly encourage code deposition in a community repository (e.g. GitHub). See the Nature Research [guidelines for submitting code & software](#) for further information.

### Data

Policy information about [availability of data](#)

All manuscripts must include a [data availability statement](#). This statement should provide the following information, where applicable:

- Accession codes, unique identifiers, or web links for publicly available datasets
- A list of figures that have associated raw data
- A description of any restrictions on data availability

The datasets used and/or analyzed during the current study are available from the corresponding author, T.W.G., on reasonable request. Source data for individual figures are available with this paper.

## Field-specific reporting

Please select the one below that is the best fit for your research. If you are not sure, read the appropriate sections before making your selection.

Life sciences       Behavioural & social sciences       Ecological, evolutionary & environmental sciences

For a reference copy of the document with all sections, see [nature.com/documents/nr-reporting-summary-flat.pdf](https://www.nature.com/documents/nr-reporting-summary-flat.pdf)

## Life sciences study design

All studies must disclose on these points even when the disclosure is negative.

|                 |                                                                                                                                                                                                                                                                                                                                                                                                                                                                                                                                                                                                                                                                                                                                                                                                                                                                                                                                        |
|-----------------|----------------------------------------------------------------------------------------------------------------------------------------------------------------------------------------------------------------------------------------------------------------------------------------------------------------------------------------------------------------------------------------------------------------------------------------------------------------------------------------------------------------------------------------------------------------------------------------------------------------------------------------------------------------------------------------------------------------------------------------------------------------------------------------------------------------------------------------------------------------------------------------------------------------------------------------|
| Sample size     | For Marburg “Angola isolate”, assuming a one-tailed alpha of 0.05, sample sizes of 5 per group will provide >80% power to detect a difference in proportion of surviving animals between the treatment group (100% survival rate) and the control group (0% survival rate), using a Fisher’s exact test. One control animal per challenge period is used to confirm lethality of challenge material used in the treatment studies where-in clinical parameters are compared with historical control animals derived from other experiments using the identical challenge material (ie same virus passage). This allows for an ethical reduction in animal number use for data with highly predictable, lethal outcomes.                                                                                                                                                                                                                |
| Data exclusions | No data was excluded from the analysis.                                                                                                                                                                                                                                                                                                                                                                                                                                                                                                                                                                                                                                                                                                                                                                                                                                                                                                |
| Replication     | Due to the ethical and technical challenges experiments involving animals, and specifically non-human primates present in BSL-4 conditions, it was not feasible to conduct multiple experimental repetitions for this study. Observational data (e.g. clinical score, observations of clinical illness) were obtained once per animal per timepoint. Hematological and serum analyte analysis, reported measurements were obtained once per animal per timepoint. While variance is expected due to the outbred nature of NHPs as well as their treatment status, confidence in results was obtained through the comparison with other animals in the same treatment cohort, and for control animals, congruence with untreated subjects from published studies. For measurements of viral load, RT-qPCR reactions or plaque titrations were performed in duplicate assays from the same biological sample (i.e technical replicates). |
| Randomization   | In the first study (assessment of remdesivir or MR186-YTE monotherapy administered 5 dpi), animals were issued a number from 1-10, and randomly assigned to groups using a random number generator. For the second study (6 dpi combination treatment study), animals were issued a number from 1-16, and randomly assigned to groups using a random number generator.                                                                                                                                                                                                                                                                                                                                                                                                                                                                                                                                                                 |
| Blinding        | Due to the academic nature of this study, as well as the inherent challenges in designing and staffing blinded studies in ABSL-4 settings, blinding was not performed for this study, as it was not necessary to answer the questions set forth by the study.                                                                                                                                                                                                                                                                                                                                                                                                                                                                                                                                                                                                                                                                          |

## Reporting for specific materials, systems and methods

We require information from authors about some types of materials, experimental systems and methods used in many studies. Here, indicate whether each material, system or method listed is relevant to your study. If you are not sure if a list item applies to your research, read the appropriate section before selecting a response.

### Materials & experimental systems

| n/a                                 | Involved in the study                                           |
|-------------------------------------|-----------------------------------------------------------------|
| <input type="checkbox"/>            | <input checked="" type="checkbox"/> Antibodies                  |
| <input type="checkbox"/>            | <input checked="" type="checkbox"/> Eukaryotic cell lines       |
| <input checked="" type="checkbox"/> | <input type="checkbox"/> Palaeontology and archaeology          |
| <input type="checkbox"/>            | <input checked="" type="checkbox"/> Animals and other organisms |
| <input checked="" type="checkbox"/> | <input type="checkbox"/> Human research participants            |
| <input checked="" type="checkbox"/> | <input type="checkbox"/> Clinical data                          |
| <input checked="" type="checkbox"/> | <input type="checkbox"/> Dual use research of concern           |

### Methods

| n/a                                 | Involved in the study                           |
|-------------------------------------|-------------------------------------------------|
| <input checked="" type="checkbox"/> | <input type="checkbox"/> ChIP-seq               |
| <input checked="" type="checkbox"/> | <input type="checkbox"/> Flow cytometry         |
| <input checked="" type="checkbox"/> | <input type="checkbox"/> MRI-based neuroimaging |

## Antibodies

|                 |                                                                                                                                                                                                                                                                                                                                                                                                                                                                                                                                                                                                                                                                                    |
|-----------------|------------------------------------------------------------------------------------------------------------------------------------------------------------------------------------------------------------------------------------------------------------------------------------------------------------------------------------------------------------------------------------------------------------------------------------------------------------------------------------------------------------------------------------------------------------------------------------------------------------------------------------------------------------------------------------|
| Antibodies used | Mouse anti-MARV NP primary antibody (provided by USAMRIID, catalog BB06-BB01, no lot #, described in PMID: 8837880)<br>Goat anti-mouse IgG antibody (H+L), biotinylated (Vector labs, Cat# BA-9200, Lot# ZB0324)                                                                                                                                                                                                                                                                                                                                                                                                                                                                   |
| Validation      | mouse anti-MARV primary antibody (provided by USAMRIID, catalog BB06-BB01)- Antibody has been validated in NHP tissues for immunohistochemistry in a previous publication (Cross et al 2019 [PMID: 31820871]). Additional validation of its use for IHC detection of MARV is included in the current manuscript, as well as unpublished studies from our laboratory.<br><br>Goat anti-mouse IgG antibody (H+L), biotinylated (Vector labs, Cat# BA-9200)- This antibody has been validated for use by immunohistochemistry by the manufacturer, and has been used in previous publications from our lab (Cross et al 2019 [PMID: 31820871], Paweska et al 2015 [PMID: 25838270 ]). |

## Eukaryotic cell lines

Policy information about [cell lines](#)

|                                                                   |                                                                                                                                                                                                                                                                                          |
|-------------------------------------------------------------------|------------------------------------------------------------------------------------------------------------------------------------------------------------------------------------------------------------------------------------------------------------------------------------------|
| Cell line source(s)                                               | Vero E6 (ATCC CRL-1586) was obtained from American Type Culture Collection (ATCC).                                                                                                                                                                                                       |
| Authentication                                                    | Independent validation of the Vero E6 cell line was not performed outside of any authentication performed by ATCC.                                                                                                                                                                       |
| Mycoplasma contamination                                          | Cells were tested for mycoplasma contamination. No detectable mycoplasma or endotoxin levels were measured (< 0.5 endotoxin units (EU)/ml). Our laboratory routinely tests all cell lines and virus seed stocks using the e-Myco Mycoplasma PCR Detection Kit (Bulldog Bio, Cat #25233). |
| Commonly misidentified lines (See <a href="#">ICLAC</a> register) | No commonly misidentified cell lines were used in the study.                                                                                                                                                                                                                             |

## Animals and other organisms

Policy information about [studies involving animals](#); [ARRIVE guidelines](#) recommended for reporting animal research

|                         |                                                                                                                                                                                                                                                                                                                                          |
|-------------------------|------------------------------------------------------------------------------------------------------------------------------------------------------------------------------------------------------------------------------------------------------------------------------------------------------------------------------------------|
| Laboratory animals      | Research-naive rhesus macaques ( <i>Macaca mulatta</i> , ~3-4 years, 3-6 kgs, balanced sex distribution)                                                                                                                                                                                                                                 |
| Wild animals            | No wild animals were used in the study.                                                                                                                                                                                                                                                                                                  |
| Field-collected samples | No field-collected samples were used in the study.                                                                                                                                                                                                                                                                                       |
| Ethics oversight        | The animal studies were performed at the Galveston National Laboratory, University of Texas Medical Branch at Galveston (UTMB) and were approved by the UTMB Institutional Animal Care and Use Committee. This facility is fully accredited by the Association for Assessment and Accreditation of Laboratory Animal Care International. |

Note that full information on the approval of the study protocol must also be provided in the manuscript.
